# Supplementary material for: Fungal oxylipins direct programmed developmental switches in filamentous fungi
Source: PubMed Central journal article supplement (PMC7557911; doi:10.1038/s41467-020-18999-0), 2020-10-14
Supplement: 41467_2020_18999_MOESM1_ESM.pdf [file 41467_2020_18999_MOESM1_ESM.pdf]

# Supplementary Information

## **Fungal oxylipins direct programmed developmental switches in filamentous fungi**

Niu et al.

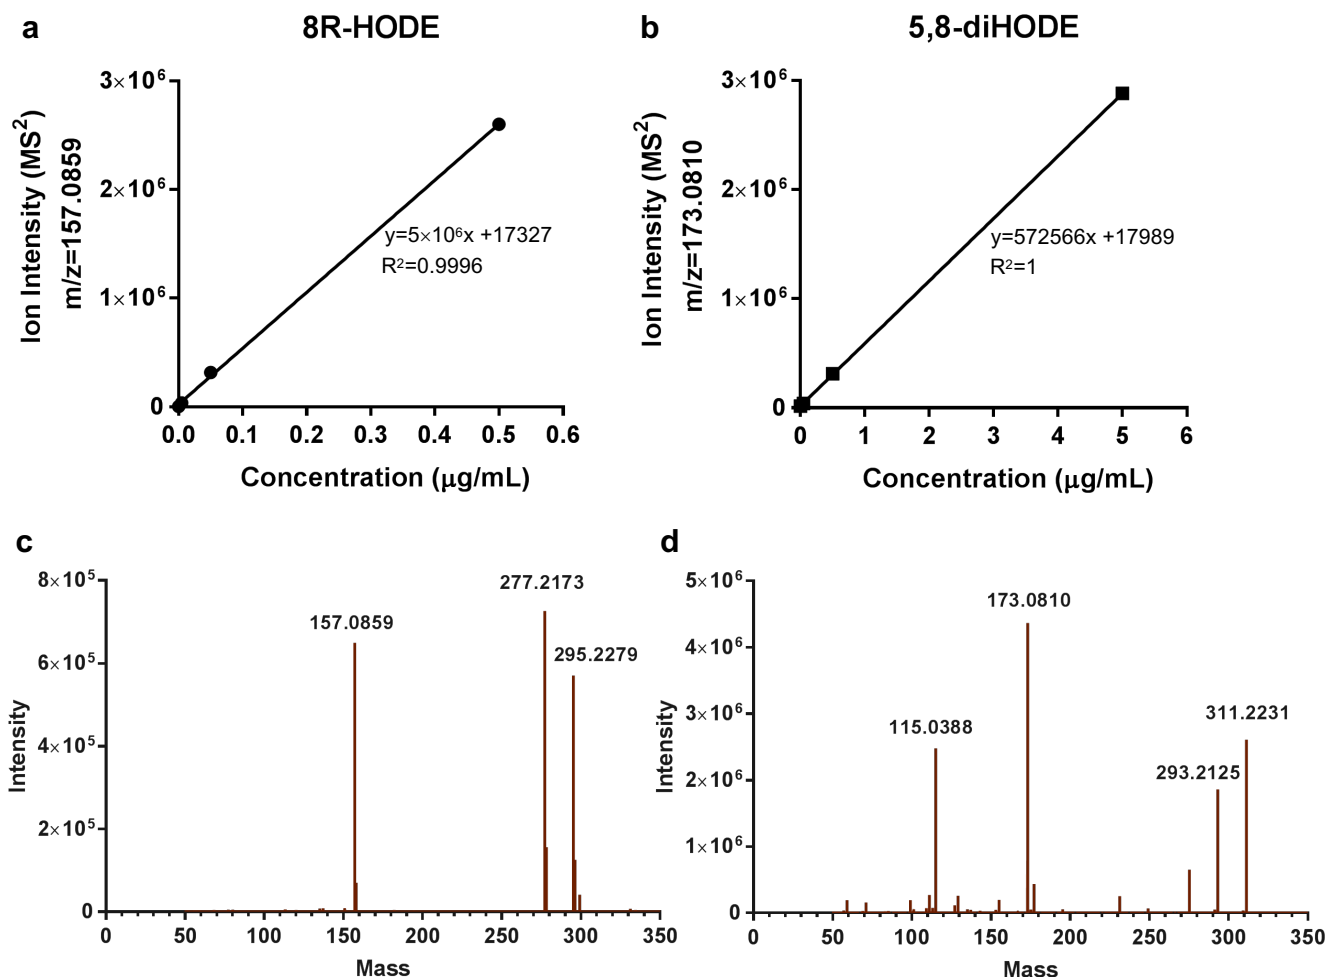

**Supplementary Fig. 1. Quantification of purified PpoA oxylipins using UHPLC-MS/MS.** Standard curves and linear regression equations depicting the (a) 8R-HODE and (b) 5,8-diHODE concentration vs. ion intensity relationship measured by UHPLC-MS/MS using purified oxylipins. Daughter  $[M-H]^-$  ions with  $m/z = 157.0859$  and  $m/z = 173.0810$  were measured to quantify 8R-HODE and 5,8-diHODE abundance, respectively<sup>19</sup>. c, Tandem mass spectrum of 8R-HODE standard identifies characteristic  $[M-H]^-$  ions with  $m/z = 157.0859$ , 277.2173, 295.2279; d, Tandem mass spectrum of 5,8-diHODE standard identifies characteristic  $[M-H]^-$  ions with  $m/z = 115.0388$ , 173.0810, 293.2125, 311.2231.

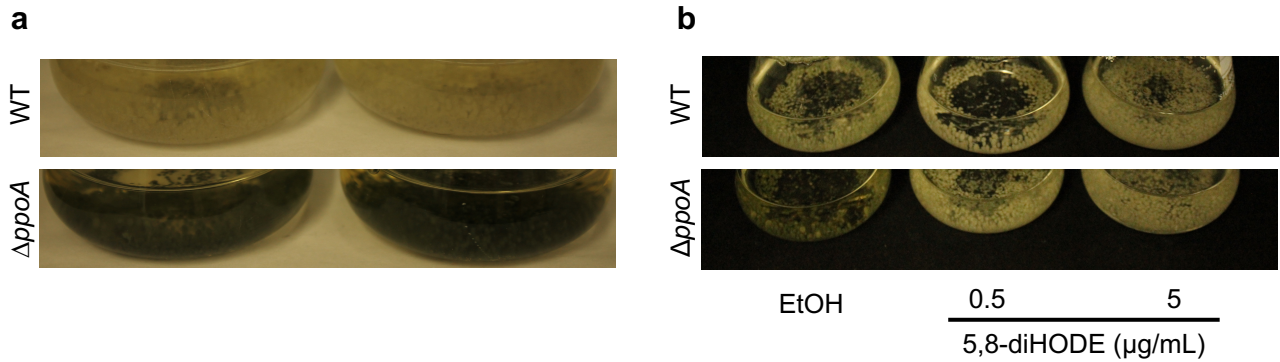

**Supplementary Fig. 2. Images of *A. fumigatus* Af293 WT and  $\Delta ppoA$  liquid cultures.** **a**,  $10^7$ /mL Af293 WT and  $\Delta ppoA$  spores were inoculated in GMM and cultured at 25°C for 5 days, under constant shaking at 250 rpm. **b**, Af293 WT and  $\Delta ppoA$  were cultured and grown as in **(a)**, and at 65 hour-post inoculation, EtOH or 5,8-diHODE were added at the indicated concentrations. All cultures were evaluated for appearance and quantified for asexual spore production at 120 hour-post inoculation.

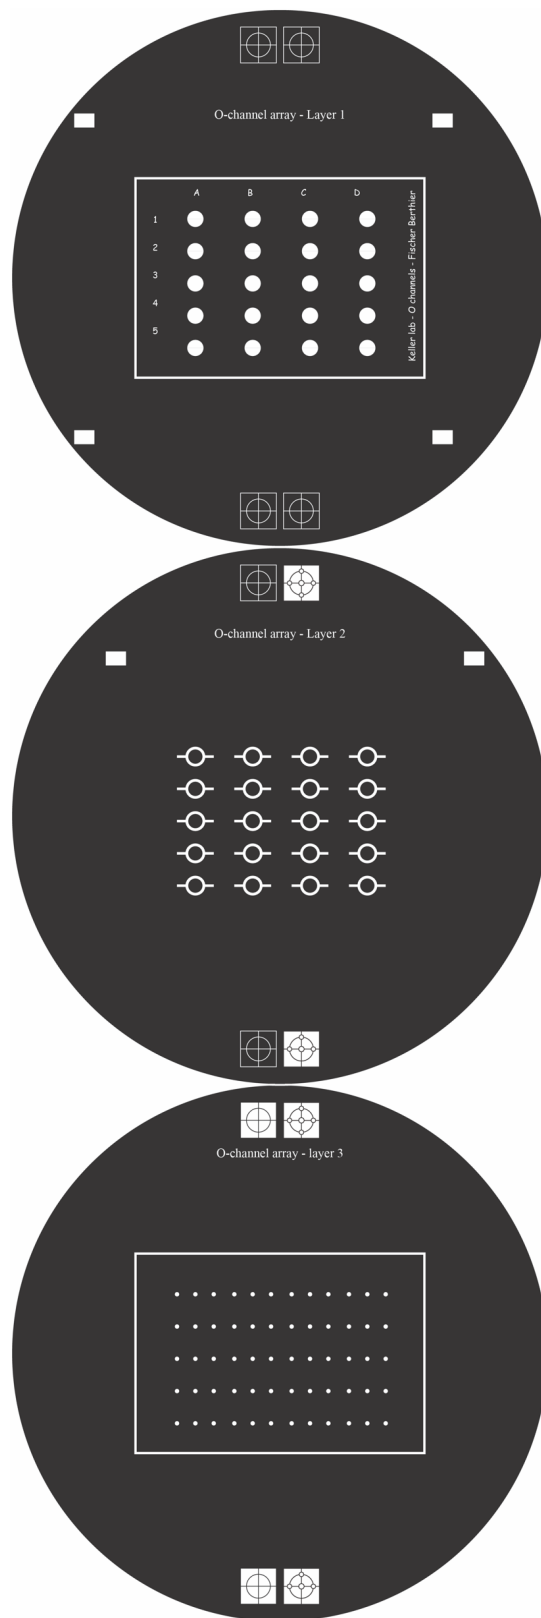

**Supplementary Fig. 3.** Illustration of the masters of the O-Channel microfluidic platform. A detailed fabrication method can be found in the Methods section.



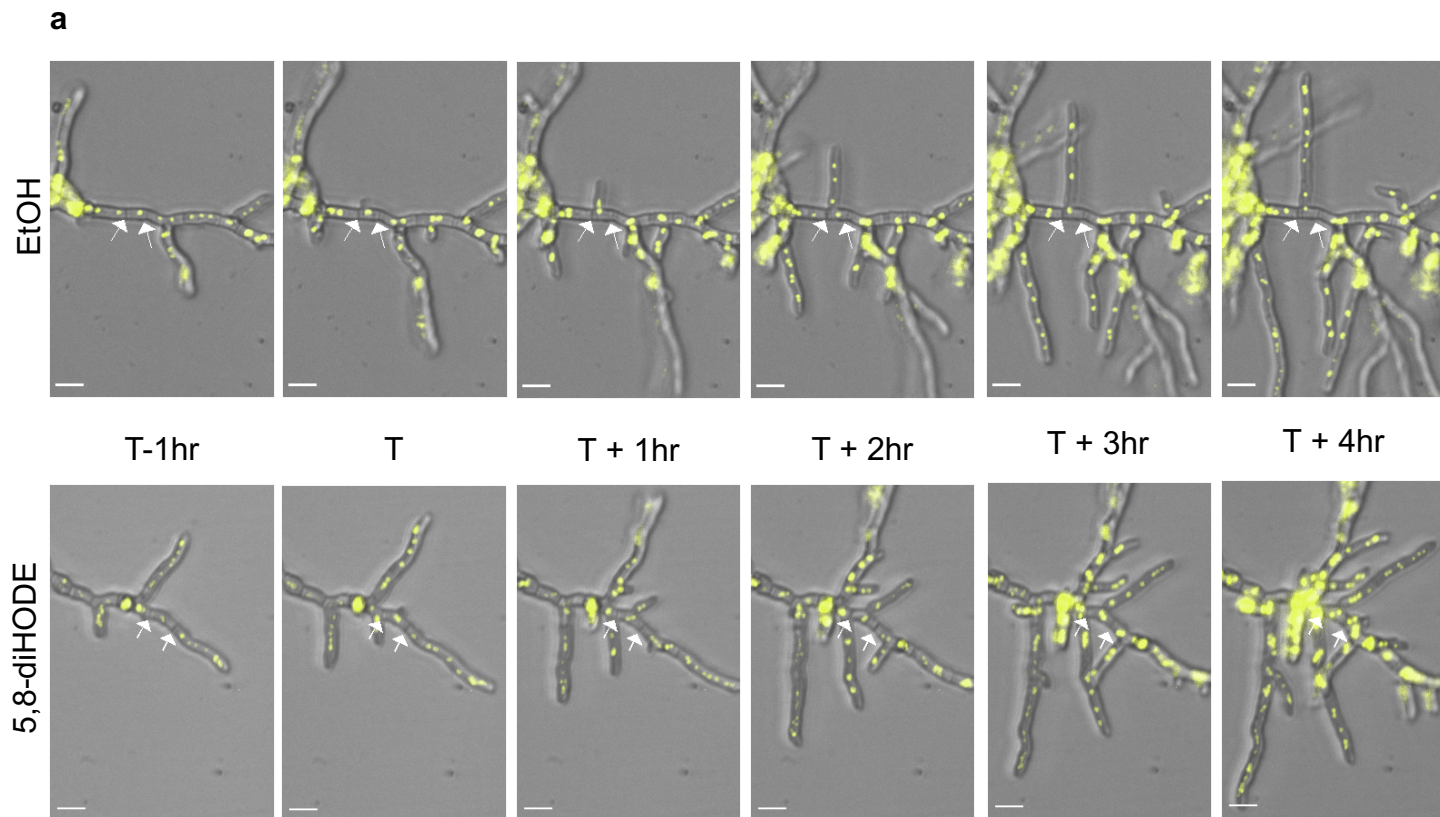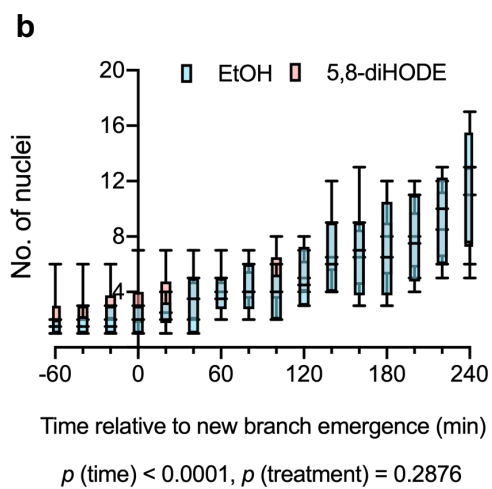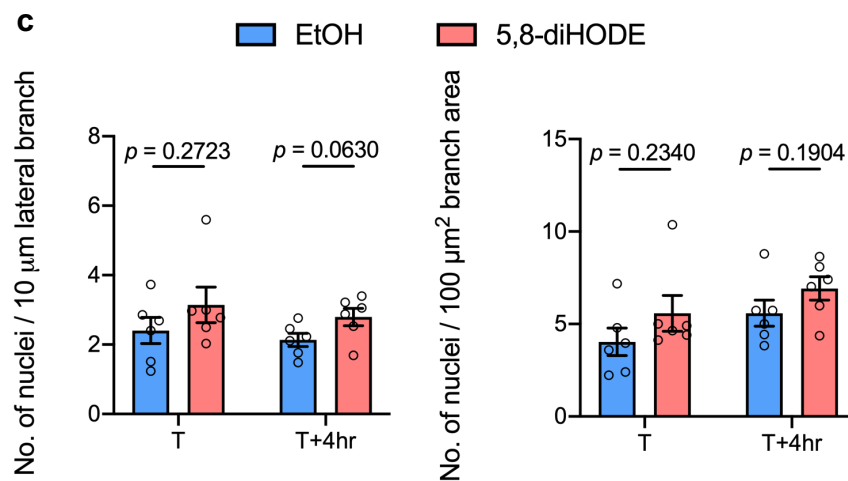

**Supplementary Fig. 4. Nuclear replication at lateral branching site is not altered by 5,8-diHODE.** GFP-histone tagged strain of *A. fumigatus* AF293 (TJMP 131.5) was grown for 7 hr in GMM at 37 °C before treated with 20 mM hydroxy urea for 2 hr, washed 3 times with GMM, exposed to either 1% EtOH or 5 µg/mL 5,8-diHODE, and settled for 1.5 hr briefly before time-lapse fluorescent imaging. **a**, Representative image series of EtOH and 5,8-diHODE treated hyphae. Images were cropped to focus on a cell compartment within the apical hypha, bordered by two adjacent septa as indicated in white arrows. A 5-hr window for nuclei analysis was selected based on the lateral branch emergence at time T. Images are representative of 6 microscopic images acquired for each condition. Scale bars represent 10 µm. **b**, Quantification of the number of nuclei within the apical hyphal cell compartment and the new lateral branch derived from it starting at 1 hr before branching until 4 hr after (n = 6). The box-and-whisker plots show maximum, 75% quartile, median, 25% quartile, and minimum of the data. Two-way ANOVA was performed to detect the effect of time and treatment. **c**, Nuclei counts normalized to the length (along the lateral branch direction) or area of the branch plus apical compartment. A two-way ANOVA test was performed to identify the effect of time and treatment in **(a)** and multiple two-sided t tests were used to compare normalized nuclei numbers between treatments at T+ 4hr and T in **(b, c)**. All values represent mean ± SEM.

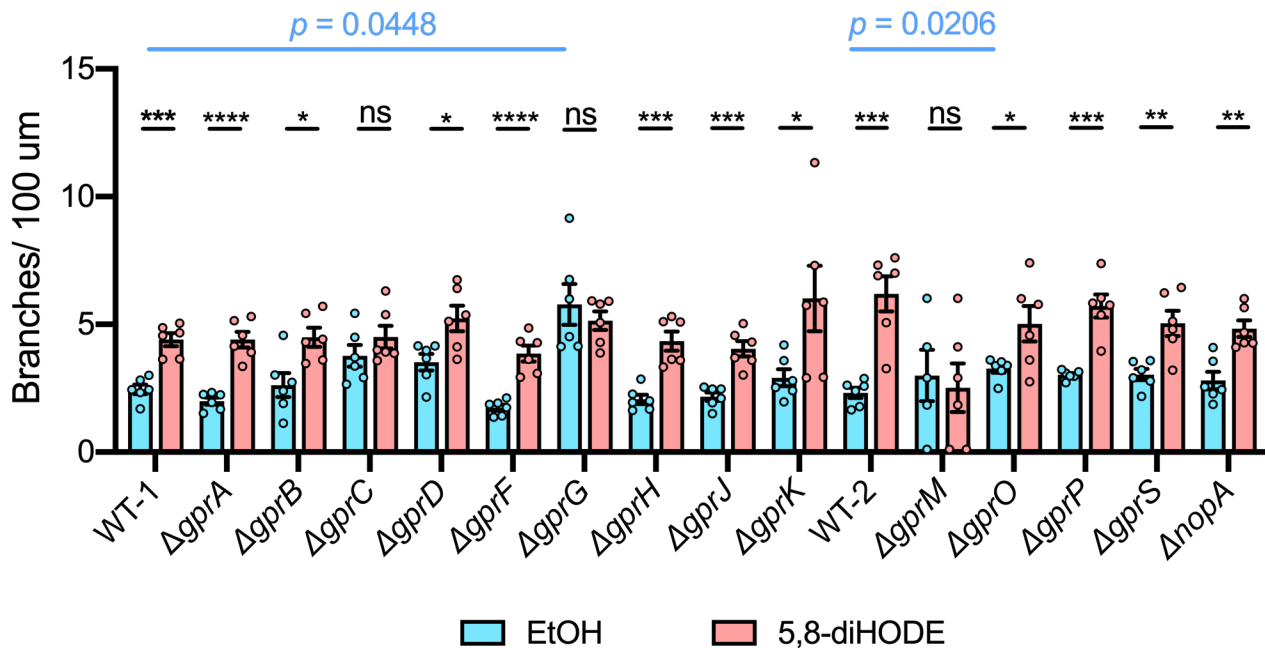

**Supplementary Fig. 5. Branching assessment of *A. flavus* canonical G-protein coupled receptor (GPCR) deletion mutants identified 3 GPCRs involved in 5,8-diHODE induced branching response.** *A. flavus* wildtype control (CA14  $\Delta ku70\Delta pyrG$ ) and GPCR mutants were cultured in microfluidic platform in GMM containing either EtOH or 5  $\mu\text{g/mL}$  5,8-diHODE. Branching was quantified at 20 hr post incubation ( $n = 6$ ). 6 randomly selected hyphae from each condition in each strain were imaged and quantified for branching. Multiple two-sided t tests were performed between conditions in the same strain, while Brown-Forsythe and Welch ANOVA tests followed by Dunnett's T3 multiple comparison test were used to compare across strains within each treatment group. Values represent mean  $\pm$  SEM. *P*-values corresponding to asterisks (\*) from left to right are: 0.0001, <0.0001, 0.0114, 0.0169, <0.0001, 0.0003, 0.0003, 0.0410, 0.0003, 0.0343, 0.0002, 0.0038, 0.0017. ns = not significant ( $p > 0.05$ ).

**a**

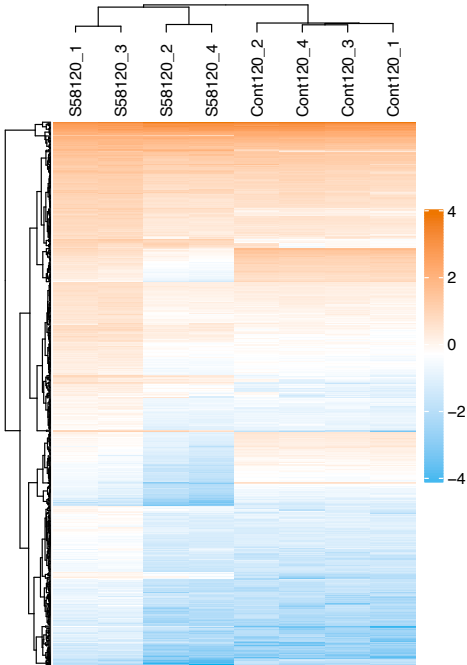

**b**

**120 min DEGs, Up-regulated**

GO Term (Molecular Function)

None

GO Term (Biological Process)

- fumagillin metabolic process
- fumagillin biosynthetic process
- epoxide metabolic process
- ether biosynthetic process
- secondary metabolic process
- secondary metabolite biosynthetic process
- ether metabolic process
- pseurotin A metabolic process
- pseurotin A biosynthetic process
- antibiotic biosynthetic process
- antibiotic metabolic process
- fumitremorgin B biosynthetic process
- fumitremorgin B metabolic process
- mycotoxin biosynthetic process
- mycotoxin metabolic process
- toxin biosynthetic process
- toxin metabolic process
- organic heteropentacyclic compound biosynthetic process
- organic heteropentacyclic compound metabolic process
- alkaloid biosynthetic process
- alkaloid metabolic process
- heterocycle biosynthetic process
- drug metabolic process

**120 min DEGs, Down-regulated**

GO Term (Molecular Function)

- transporter activity
- transmembrane transporter activity

GO Term (Biological Process)

NA

**c**

**Up-regulated**

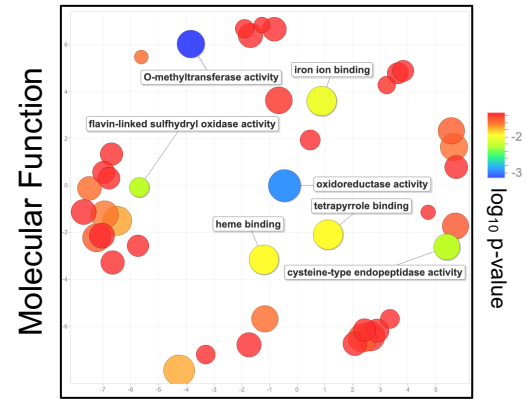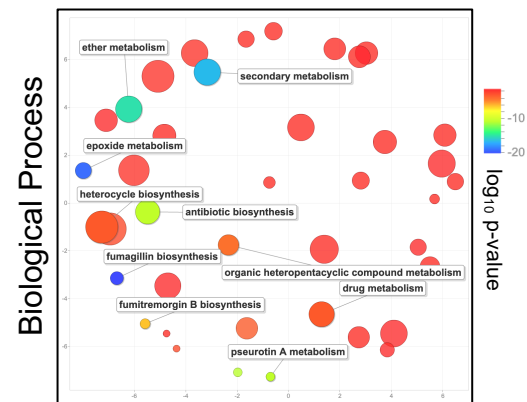

**Down-regulated**

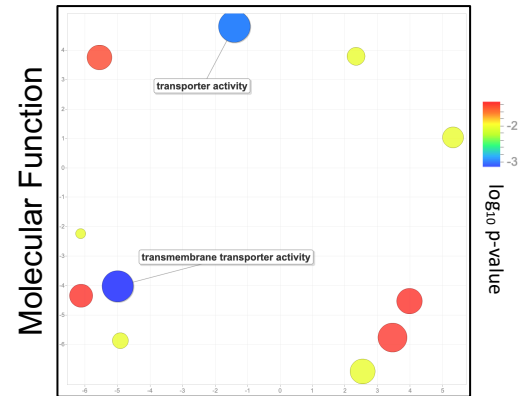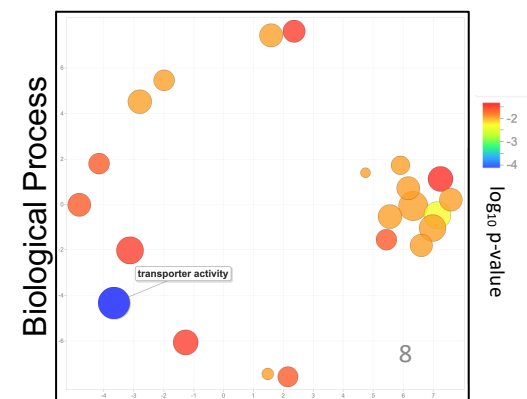

**Supplementary Fig. 6. RNA sequencing analysis of the transcriptomes after 120 min exposure of hyphae to 5,8-diHODE or EtOH.** **a**, Hierarchical clustering analysis depicts differentially expressed genes (DEGs) with  $FDR < 0.05$  and  $|\log_2FC| > 1$  at 30 min post treatment. The  $\log_2$  values of FPKM (Fragments Per Kilobase of transcript per Million mapped reads) were used to construct the heat map using the ComplexHeatmap package in R. Log transformation was performed via the zfpkm package and genes with  $\log_2(FPKM) \leq -3$  were disregarded. Cont120: EtOH controls at 120 min; S58120: 5,8-diHODE treated samples at 120 min. **b**, GO analysis of DEGs ( $|\log_2FC| > 1$ ) at 120 min post treatment was performed using FungiDB. A Fisher's Exact test followed by Benjamini-Hochberg multiple-testing correction was performed and GO terms with false discovery rate  $< 0.05$  are listed. **c**, All over-represented GO terms with Fischer's Exact test  $p$ -value  $< 0.05$  in the GO analysis were used to generate scatterplots with REVIGO to eliminate redundant terms. Semantic relations between GO terms are represented as the relative distance between each circle.

**a****30 min DEGs, Up-regulated****GO Term (Molecular Function)**

calcium-dependent phospholipid binding

**GO Term (Biological Process)**

fumitremogin B biosynthetic process  
 fumitremogin B metabolic process  
 organic heteropentacyclic compound biosynthetic process  
 organic heteropentacyclic compound metabolic process  
 indole alkaloid metabolic process  
 indole alkaloid biosynthetic process  
 alkaloid biosynthetic process  
 mycotoxin biosynthetic process  
 alkaloid metabolic process  
 toxin biosynthetic process  
 mycotoxin metabolic process  
 toxin metabolic process  
 ether biosynthetic process  
 verruculogen biosynthetic process  
 prostaglandin biosynthetic process  
 brevianamide F metabolic process  
 prostaglandin metabolic process  
 oxylipin metabolic process  
 dipeptide transport  
 prostanoid metabolic process  
 prostanoid biosynthetic process  
 verruculogen metabolic process  
 oxylipin biosynthetic process  
 fatty acid derivative biosynthetic process  
 eicosanoid metabolic process  
 eicosanoid biosynthetic process

**30 min DEGs, Down-regulated****GO Term (Molecular Function)**

NA

**GO Term (Biological Process)**

NA

**b****Up-regulated**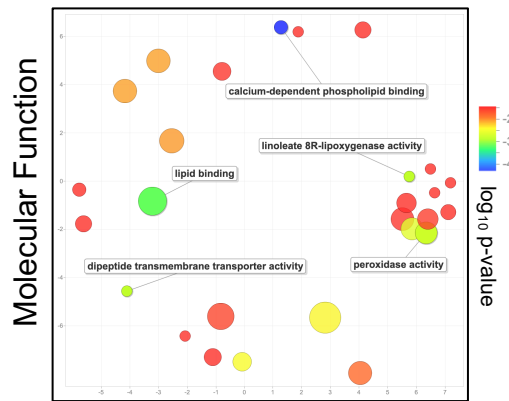**Down-regulated**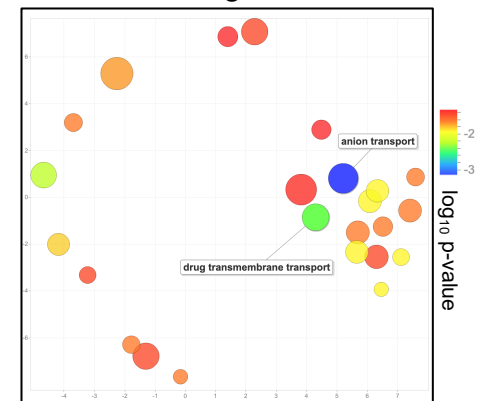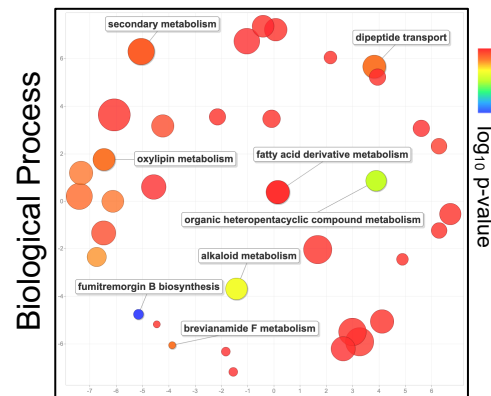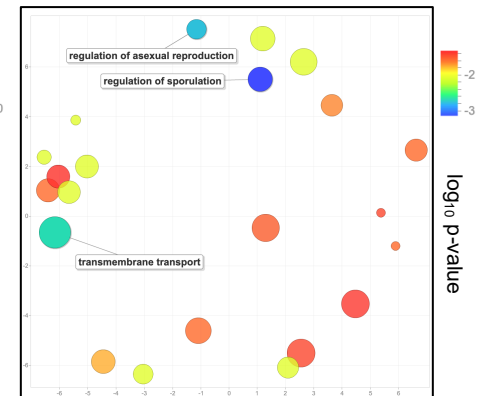

**Supplementary Fig. 7. Gene Ontology (GO) analysis of over-represented differentially expressed genes with  $|\text{Log}_2\text{FC}| > 1$  in 5,8-diHODE-treated vs. EtOH-treated samples at 30 min post treatment. a,** GO analysis of DEGs ( $|\text{Log}_2\text{FC}| > 1$ ) at 30 min post treatment was performed using FungiDB. A Fisher's Exact test followed by Benjamini-Hochberg multiple-testing correction was performed and GO terms with false discovery rate  $< 0.05$  are listed. **b,** All over-represented GO terms with Fischer's Exact Test  $p$ -value  $< 0.05$  in the GO analysis were used to generate scatterplots with REVIGO to eliminate redundant terms. Semantic relations between GO terms are represented as the relative distance between each circle.

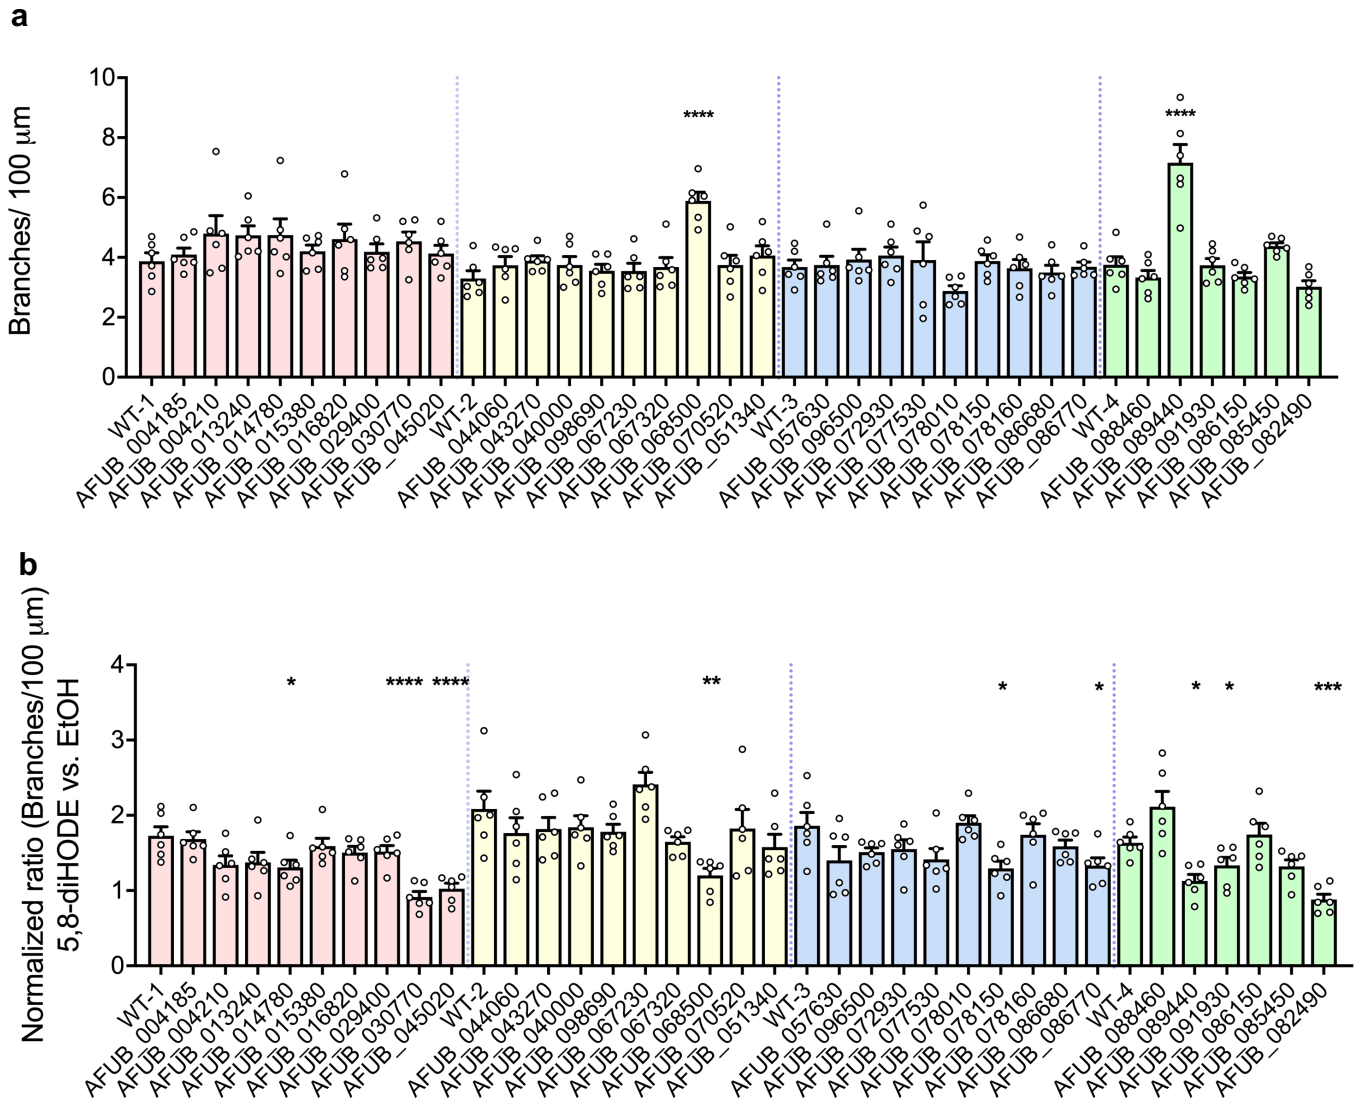

**Supplementary Fig. 8. Initial screen of 33 transcription factor deletion mutants identifies 9 transcription factors showing differential hyphal branching either in GMM + 1% EtOH or in response to 5,8-diHODE (5  $\mu$ g/mL). a, Branching analysis of the WT control (MFIG001) and the mutants in GMM + 1% EtOH. 1000 spores in 100  $\mu$ L were inoculated in 96-well plate, incubated for 15 hr before time-lapse imaging. Hyphal branching analysis was performed on images acquired at 20 hr post incubation. Strains with the same color were screened in the same batch and compared to the WT in that batch. *P*-values corresponding to asterisks (\*) from left to right are: <0.0001, <0.0001. b, Normalized ratios of branches/100  $\mu$ m of all strains grown in GMM + 5,8-diHODE vs. GMM + EtOH. *P*-values corresponding to asterisks (\*) from left to right are: 0.0321, <0.0001, <0.0001, 0.0044, 0.0184, 0.0313, 0.0388, 0.0255, 0.0005. Ordinary one-way ANOVA with post-hoc Dunnett's multiple comparison test was used to compare between mutant and the corresponding WT control. Data obtained from different experiments are separated by vertical dashed lines. All values represent mean  $\pm$  SEM.**



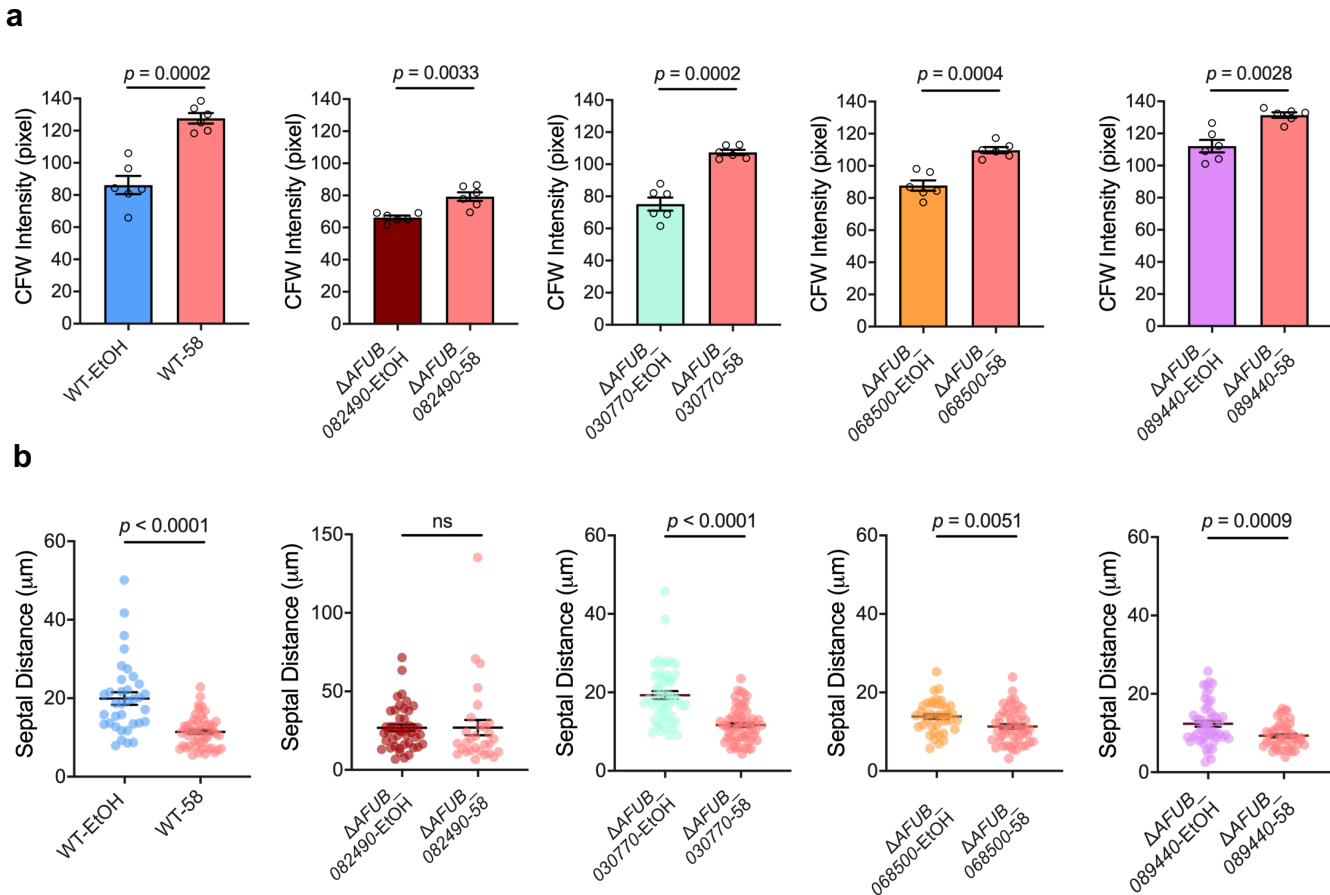

**Supplementary Fig. 9. Deletion mutants of transcription factors display alterations in septal distance and chitin content in hyphae.** **a**, Quantification of CFW fluorescence intensity in CEA10 TF mutants and the A1160 *pyrG*<sup>+</sup> WT control. 2500 spores in 400  $\mu$ L were inoculated in 24-well plate pre-mounted with coverslip at the bottom. All cultures were incubated for 14 hr before CFW staining and imaging. Acquired DAPI images were analyzed in FIJI. Hyphae in each image was selected through the thresholding function in FIJI, and the mean fluorescence intensity of each threshold area was measured. **b**, Quantification of septal distance in CEA10 TF mutants and the A1160 *pyrG*<sup>+</sup> WT control. Septa were visualized in the acquired DAPI images and distances were measured in the NIS software package. All comparisons were made using two-sided Welch's t-test. All values represent mean  $\pm$  SEM. ns = not significant ( $p > 0.05$ ).



**a**

Gene of Interest (GOI) = AFUB\_082490 or AFUB\_089440

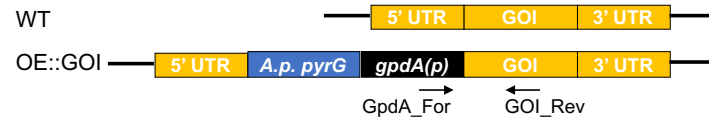

**b**

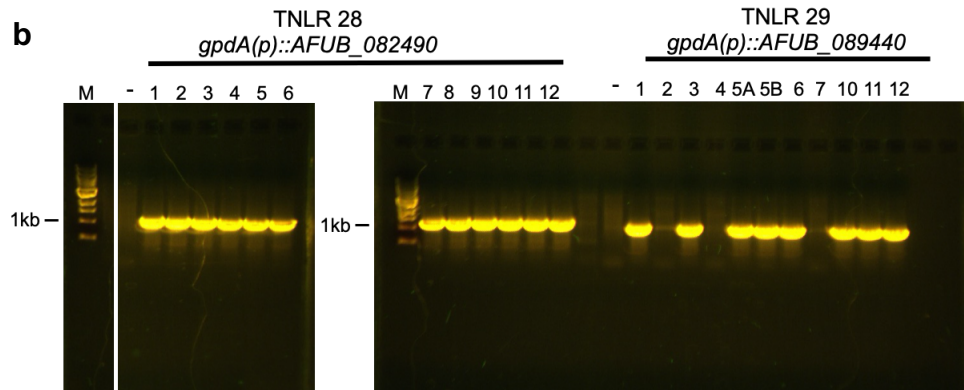

**c**

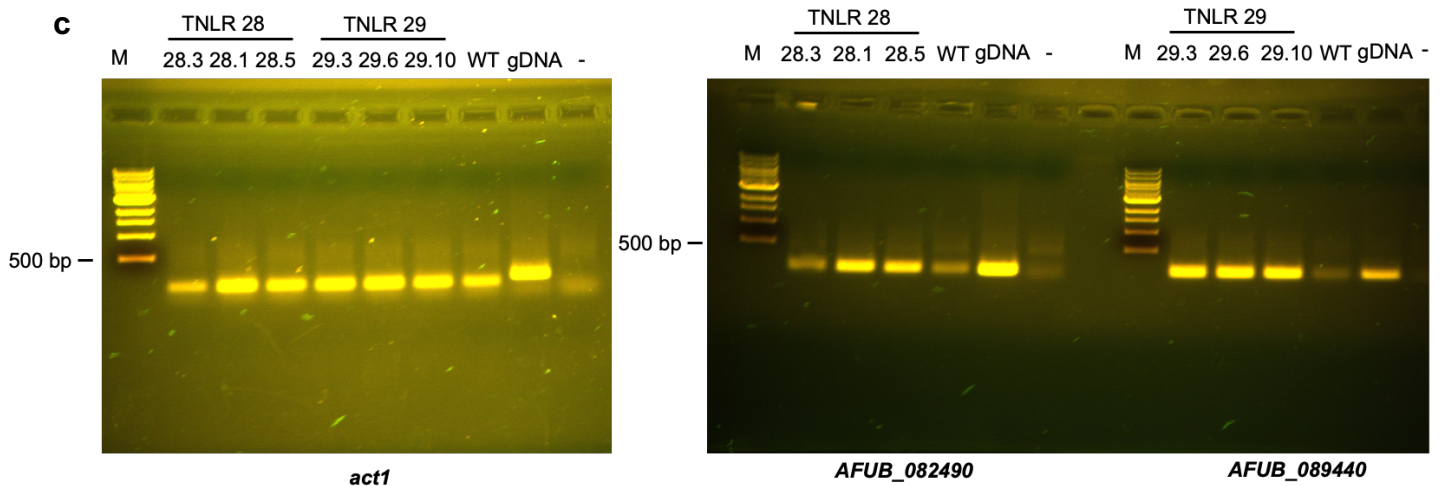

**Supplementary Fig. 10. Construction of the *AFUB\_082490* and *AFUB\_089440* overexpression mutants.** **a**, Genetic contexts of the wildtype (A1160 *pyrG*<sup>+</sup>) and the OE::*AFUB\_082490*. Double fusion PCR was performed to create transformation genetic construct to insert the *A. nidulans gpdA* promoter fused with the selection marker *A. parasiticus pyrG* in front of the transcription start site of *AFUB\_082490* or *AFUB\_089440*. The genetic construct was transformed into uridine/uracil auxotroph CEA17  $\Delta$ *pyrG*. Primer pairs of the forward primer *gpdA\_For* and the reverse primer *GOI\_Rev* were used for positive selection of target mutants via PCR. **b**, Results of PCR screen of transformation mutants. A 1kb fragment was expected to be amplified from correct OE::*AFUB\_082490* TNLR 28 an OE::*AFUB\_089440* TNLR 29 mutants. **c**, Assessment of *AFUB\_082490* and *AFUB\_089440* expression in 3 independent transformants of TNLR 28 and TNLR 29 confirmed in (**b**) and the WT A1160 *pyrG*<sup>+</sup> through semi-quantitative PCR. *act1* was assessed visually to control for even loading. gDNA and water were used as positive and negative control for PCR.

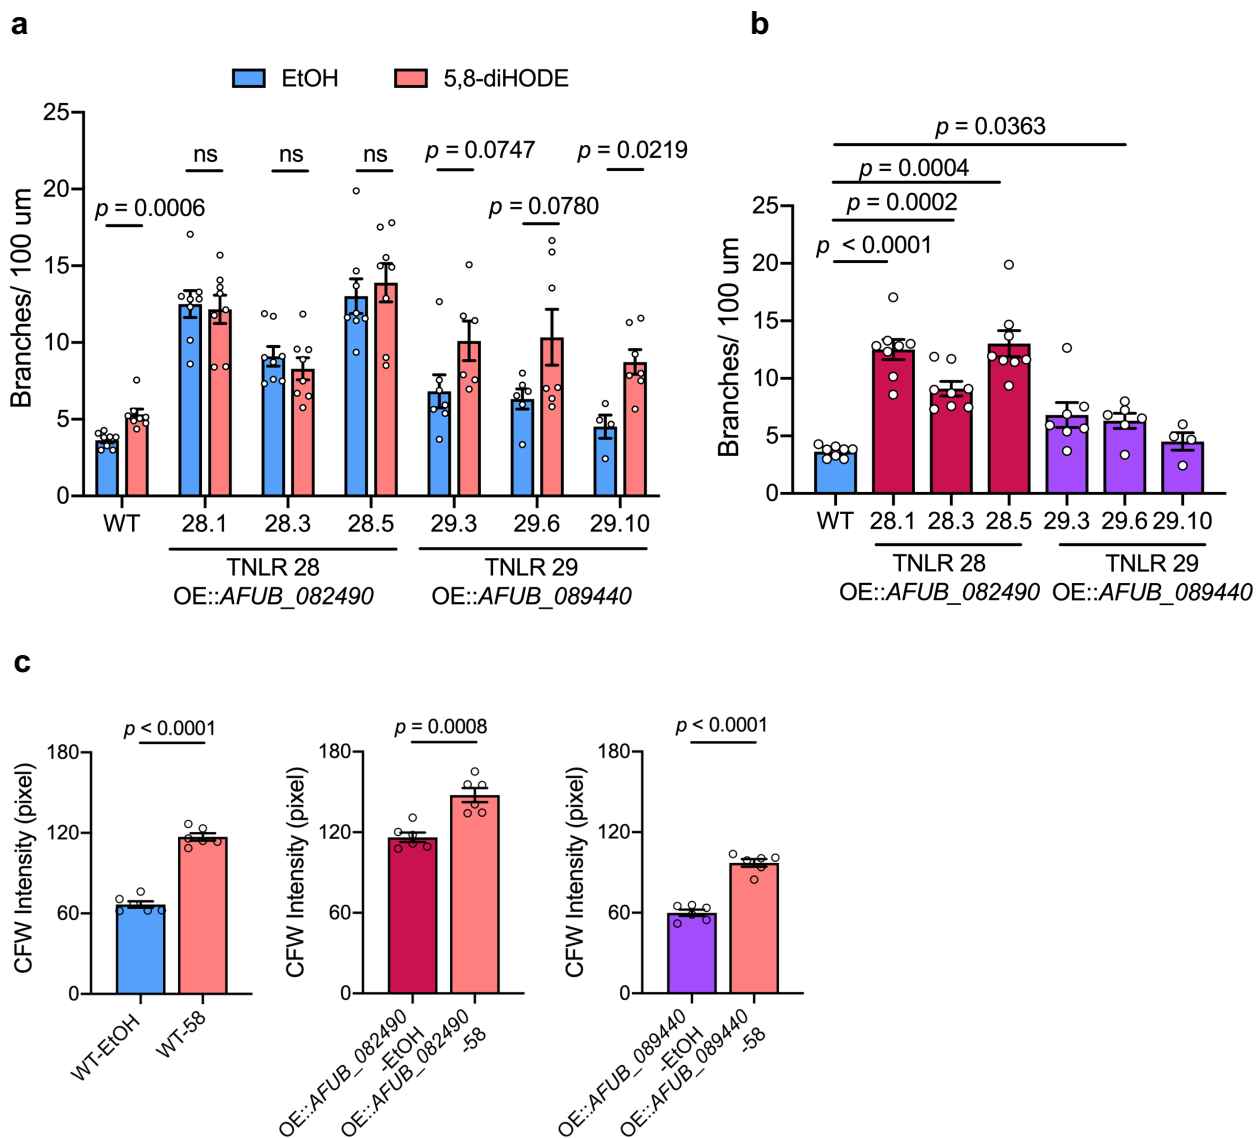

**Supplementary Fig. 11. Phenotype assessment of OE::AFUB\_082490 and OE::AFUB\_089440 mutants.** **a**, Assessment of branching response of the A1160 *pyrG*<sup>+</sup> WT control and 3 independent transformants of OE::AFUB\_082490 and OE::AFUB\_089440. Branching assessment was performed in 96-well format with hyphae grown in GMM + 1% EtOH or GMM + 5  $\mu$ g/mL of 5,8-diHODE. Quantification was performed on 20 hr-old hyphae that contained more than 2 lateral branches at time of data acquisition (n = 8 for WT and TNR 28 mutants, n = 7 for TNR 29.3, n = 6 for TNR 29.6, and n = 4 for TNR 29.10). **b**, Branching levels of the A1160 *pyrG*<sup>+</sup> WT, OE::AFUB\_082490, and OE::AFUB\_089440 when grown in GMM + 1% EtOH in **(a)**. **c**, CFW intensity of hyphae from the A1160 *pyrG*<sup>+</sup> WT and the TF overexpression strains, quantified using images acquired in **Fig. 7a** as described in the Methods section. Two-sided Welch's t-test was used to compare between treatment groups in **(a, c)** and Brown-Forsythe and Welch ANOVA tests followed by post-hoc Dunnett's T3 multiple comparison test were used to compare across strains in **(b)**. All values represent mean  $\pm$  SEM. ns = not significant ( $p > 0.05$ ).

**a**

| Gene ID      | Log <sub>2</sub> FC (30 min) | Log <sub>2</sub> FC (120 min) | Gene Description                           |
|--------------|------------------------------|-------------------------------|--------------------------------------------|
| AFUA_1G03800 | 0.97884                      | 1.1427                        | C6 transcription factor, putative          |
| AFUA_1G13750 | 0.84172                      | 1.3687                        | C2H2 transcription factor (Rpn4), putative |
| AFUA_1G15230 | 0.71812                      | 1.0266                        | C6 transcription factor, putative          |
| AFUA_1G15850 | 0.82339                      | 1.1581                        | C6 transcription factor, putative          |
| AFUA_1G17460 | 1.4327                       | 1.1581                        | C6 transcription factor, putative          |
| AFUA_3G02590 | 1.0865                       | 1.1647                        | C6 transcription factor, putative          |
| AFUA_3G03230 | 0.49477                      | 1.1139                        | bZIP transcription factor, putative        |
| AFUA_3G03900 | 1.2672                       | 1.2637                        | C6 transcription factor, putative          |
| AFUA_3G05760 | 1.2526                       | 1.0585                        | C6 transcription factor (Fcr1), putative   |
| AFUA_3G09130 | 1.4708                       | 0.75138                       | C6 transcription factor, putative          |
| AFUA_4G10110 | 0.8675                       | 1.0677                        | homeobox transcription factor, putative    |
| AFUA_4G10200 | 1.1313                       | 1.2302                        | transcription factor RfeF, putative        |
| AFUA_5G10040 | -                            | 1.1284                        | C6 transcription factor, putative          |
| AFUA_6G01840 | 1.0192                       | 0.71543                       | C6 transcription factor, putative          |
| AFUA_6G07010 | -                            | 1.7052                        | C6 transcription factor RosA               |
| AFUA_6G11520 | 2.4579                       | 1.4945                        | C6 transcription factor, putative          |
| AFUA_6G12020 | 1.1448                       | -                             | C2H2 finger domain protein, putative       |
| AFUA_6G12150 | 1.4053                       | -                             | bZIP transcription factor (Atf7), putative |
| AFUA_6G12160 | 1.4865                       | 1.2913                        | C6 transcription factor, putative          |
| AFUA_7G00210 | 1.0245                       | 1.0559                        | C6 transcription factor, putative          |
| AFUA_7G03910 | 1.0648                       | 1.2933                        | C2H2 zinc finger protein                   |
| AFUA_7G04820 | -                            | 1.7195                        | C6 transcription factor, putative          |
| AFUA_8G00420 | 1.0539                       | 1.4364                        | C6 finger transcription factor, putative   |
| AFUA_8G05010 | 2.6181                       | 3.4992                        | C2H2 finger domain protein, putative       |

**b**

| Gene ID      | Log <sub>2</sub> FC (30 min) | Log <sub>2</sub> FC (120 min) | Gene Description                           |
|--------------|------------------------------|-------------------------------|--------------------------------------------|
| AFUA_1G03780 | -1.1048                      | -0.63548                      | C6 finger domain protein, putative         |
| AFUA_2G13770 | -1.0264                      | -                             | C2H2 conidiation transcription factor FlbC |
| AFUA_2G15110 | -2.2696                      | -                             | C2H2 finger domain protein, putative       |
| AFUA_4G04320 | -1.2774                      | -2.0421                       | homeobox transcription factor, putative    |
| AFUA_4G11480 | -1.4949                      | -                             | C2H2 finger domain protein, putative       |
| AFUA_4G13600 | -1.3444                      | -                             | C2H2 finger domain protein, putative       |
| AFUA_5G02800 | -1.1179                      | -0.75052                      | C6 transcription factor, putative          |
| AFUA_7G00130 | -1.3014                      | -                             | C6 transcription factor, putative          |
| AFUA_7G01890 | -0.69089                     | -1.2652                       | C6 transcription factor, putative          |
| AFUA_7G06370 | -1.1062                      | -                             | C6 transcription factor, putative          |
| AFUA_8G01150 | -0.96336                     | -1.0155                       | C6 transcription factor, putative          |

**Supplementary Table 1.** List of differentially expressed genes (DEGs) that encode putative transcriptional factors and have more than 2-fold **(a)** under- or **(b)** over-expression when hyphae were treated with 5 µg/mL 5,8-diHODE compared with EtOH control in the RNA Sequencing experiment. Yellow cells represent DEGs at both 30 min and 120 min, blue cells represent DEGs at 30 min only, purple cells represent DEGs at 120 min only.

| Name                    | Sequence (5'-3')                                        | Purpose                                      |
|-------------------------|---------------------------------------------------------|----------------------------------------------|
| MN_AFUA_2G15110_FOR     | ATGCATTCAAGCGCTTATGCC                                   | qRT-PCR of AFUA_2G15110 Forward              |
| MN_AFUA_2G15110_REV     | GGACGATCGCAGTTGAAATTGAG                                 | qRT-PCR of AFUA_2G15110 Reverse              |
| MN_act1_FOR             | CTTCCAGCCTAGCGTTCT                                      | qRT-PCR of actin1_Forward                    |
| MN_act1_REV             | GTACATGGTGGTACCACCAG                                    | qRT-PCR of actin1_Reverse                    |
| MN_aslA_FOR             | CGTAAATCCGATCTCTGCAGAC                                  | qRT-PCR of AFUA_4G11480 Forward              |
| MN_aslA_REV             | GAGGCTTTTCGCCAGTGTG                                     | qRT-PCR of AFUA_4G11480 Forward              |
| MN_nsdC_FOR             | GGCTGCATTGACGCAATCGAC                                   | qRT-PCR of AFUA_7G03910 Forward              |
| MN_nsdC_REV             | CGATGGACGTCAAGCTCGAATC                                  | qRT-PCR of AFUA_7G03910 Reverse              |
| MN_zfpA_FOR             | GGA CTGTCACGTCAACAAC                                    | qRT-PCR of AFUA_8G05010 Forward              |
| MN_zfpA_REV             | CCGTAATAAGATGTTGGTGCGC                                  | qRT-PCR of AFUA_8G05010 Reverse              |
| NR AFUB_082490 5' FOR   | TTATTTTGCCCGACTCTTGG                                    | Creating OE::AFUB_082490 strain              |
| NR AFUB_082490 NEST FOR | CAATGCACACCAGATGATCC                                    | Creating OE::AFUB_082490 strain              |
| NR AFUB_082490 5' REV   | CCCTATAGTGAGTCGTATTACGG<br>ATGGCTTCTTTGTGCGCTAAT        | Creating OE::AFUB_082490 strain              |
| NR AFUB_082490 3' FOR   | CTTGAGCAGACATCACCATGATG<br>TTGGCATTGGACTCGTC            | Creating OE::AFUB_082490 strain              |
| NR AFUB_082490 NEST REV | TTCCCTTGTAATGGGTGAGC                                    | Creating OE::AFUB_082490 strain              |
| NR AFUB_082490 3' REV   | CGCTTAAAGACATCCGCTCT                                    | Creating OE::AFUB_082490 strain              |
| NR AFUB_089440 5' FOR   | GTGTTCCGCCCTCAGAAAGAG                                   | Creating OE::AFUB_089440 strain              |
| NR AFUB_089440 NEST FOR | GCCCATCAGTCAGTCCATCT                                    | Creating OE::AFUB_089440 strain              |
| NR AFUB_089440 5' REV   | CCCTATAGTGAGTCGTATTACGG<br>GATAACAGATGCTTGTGTC CGC<br>C | Creating OE::AFUB_089440 strain              |
| NR AFUB_089440 3' FOR   | CTTGAGCAGACATCACCATGATG<br>GCTGCATTGACGCAATC            | Creating OE::AFUB_089440 strain              |
| NR AFUB_089440 NEST REV | GCGCAAAACTTCCCATACTG                                    | Creating OE::AFUB_089440 strain              |
| NR AFUB_089440 3' REV   | GACCGTCCATGGTATCTTCG                                    | Creating OE::AFUB_089440 strain              |
| NLR_gpdA_FOR            | ATTCATCTTCCCATCCAAGAACC                                 | PCR screen of OE::TF transformants_Forward   |
| NLR_zfpA_REV            | CGCTTAAAGACATCCGCTCT                                    | PCR screen for TNLr 28 transformants_Reverse |
| NLR_nsdC_REV            | GACCGTCCATGGTATCTTCG                                    | PCR screen for TNLr 29 transformants_Reverse |

**Supplementary Table 2.** Primers used in this study.
