# Supplementary material for: Fungal oxylipins direct programmed developmental switches in filamentous fungi
Source: PubMed Central journal article supplement (PMC7557911; doi:10.1038/s41467-020-18999-0), 2020-10-14
Supplement: 41467_2020_18999_MOESM3_ESM.pdf [file 41467_2020_18999_MOESM3_ESM.pdf]

## Description of Additional Supplementary Files

File Name: Supplementary Data 1

Description: Differentially expressed genes (DEGs) identified in the RNA Sequencing experiment. All DEGs with  $P$ -value  $< 0.05$  are listed with  $P$ -values designated for each gene.

File Name: Supplementary Data 2

Description: Gene Ontology (GO) terms of over-represented by differentially expressed genes with  $\text{Log}_2(\text{fold change}) > 1$  at 30 min and 120 min in the RNA Sequencing experiment. A Fisher's Exact test followed by Benjamini-Hochberg multiple-testing correction was performed and GO terms with false discovery rate  $< 0.05$  are listed.

File Name: Supplementary Movie 1

Description: Time-lapse images of germinated Af293 growing in GMM containing EtOH at 37 15-20 hours post incubation. Scale bar represents 50  $\mu\text{m}$ .

File Name: Supplementary Movie 2

Description: Time-lapse images of germinated Af293 growing in GMM containing 5  $\mu\text{g}/\text{mL}$  5,8-diHODE at 15-20 hours post incubation. Scale bar represents 50  $\mu\text{m}$ .

File Name: Supplementary Movie 3

Description: Time-lapse images of germinated CEA10 growing in GMM containing EtOH at 15-20 hours post incubation. Scale bar represents 50  $\mu\text{m}$ .

File Name: Supplementary Movie 4

Description: Time-lapse images of germinated CEA10 growing in GMM containing 5  $\mu\text{g}/\text{mL}$  5,8-diHODE at 15-20 hours post incubation. Scale bar represents 50  $\mu\text{m}$ .

File Name: Supplementary Movie 5

Description: Time-lapse images of germinated  $\Delta\text{AFUB}_{089440}/\text{nsdC}$  growing in GMM containing EtOH at 19-23.5 hour-post incubation. Scale bar represents 50  $\mu\text{m}$ .
